# Supplementary material for: Regenerating Skeletal Muscle Compensates for the Impaired Macrophage Functions Leading to Normal Muscle Repair in Retinol Saturase Null Mice
Source: MDPI journal article supplement (doi:10.3390/cells11081333), 2022-04-13
Supplement: s1 [file s1]

## Supplementary Materials

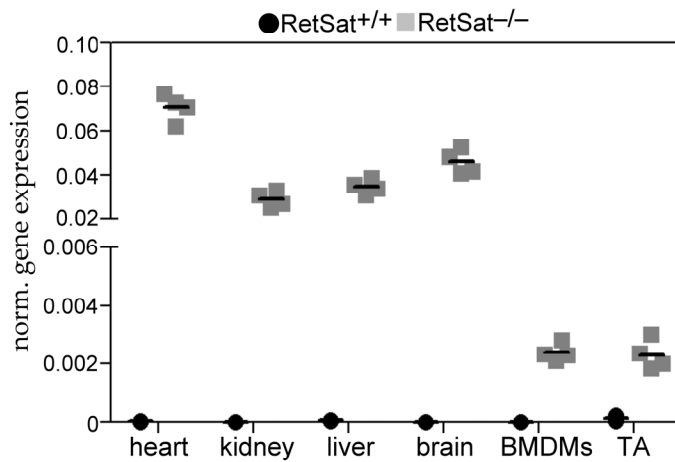

**Figure S1.** The expression of neomycin resistance expression cassette (neoR), replacing exon 1 of RetSat gene in various tissues isolated from wild-type and full-body RetSat<sup>-/-</sup> mice determined by RT-qPCR.

The homozygous RetSat<sup>-/-</sup> mice were generated by homologous recombination in embryonic stem cells to replace exon 1 of the wild-type RetSat gene with a neoR cassette. The neoR cassette replaced an approximate 2 kbp of the RetSat gene, including exon 1 containing the translation start ATG. The mutated gene is expressed and neoR can be detected by RT-qPCR but there is no functional RetSat protein expression [29]. n=4.
